# Supplementary material for: Pet Attachment and Wellbeing of Older-Aged Recreational Horseback Riders
Source: PubMed Central journal article supplement (PMC7143422; doi:10.3390/ijerph17061865), 2020-03-13

How do you usually feel during/after riding?

Please mark with a cross where applicable and state why you agree.

|                                                       | <b>During riding /<br/>dog playing or<br/>walking</b> | What do you think<br>are the reasons?<br><i>Enter manually</i> | <b>After riding /<br/>dog playing or<br/>walking</b> | What do you think are the<br>reasons?<br><i>Enter manually</i> |
|-------------------------------------------------------|-------------------------------------------------------|----------------------------------------------------------------|------------------------------------------------------|----------------------------------------------------------------|
| 1. Overall relaxed                                    | O                                                     |                                                                | O                                                    |                                                                |
| 2. Physical fit                                       | O                                                     |                                                                | O                                                    |                                                                |
| 3. I forget my pain                                   | O                                                     |                                                                | O                                                    |                                                                |
| 4. Entirely well                                      | O                                                     |                                                                | O                                                    |                                                                |
| 5. In harmony with the<br>horse/dog                   | O                                                     |                                                                | O                                                    |                                                                |
| 6. Physically tired                                   | O                                                     |                                                                | O                                                    |                                                                |
| 7. I forget my worries                                | O                                                     |                                                                | O                                                    |                                                                |
| 8. Stressed                                           | O                                                     |                                                                | O                                                    |                                                                |
| 9. Mentally fit                                       | O                                                     |                                                                | O                                                    |                                                                |
| 10. Have high pulse rate                              | O                                                     |                                                                | O                                                    |                                                                |
| 11. Mental tired                                      | O                                                     |                                                                | O                                                    |                                                                |
| 12. Mental relaxed                                    | O                                                     |                                                                | O                                                    |                                                                |
| 13. Assertive                                         | O                                                     |                                                                | O                                                    |                                                                |
| 14. I'm full of energy                                | O                                                     |                                                                | O                                                    |                                                                |
| 15. Understood                                        | O                                                     |                                                                | O                                                    |                                                                |
| 16. I feel pain                                       | O                                                     |                                                                | O                                                    |                                                                |
| 17. Tensed                                            | O                                                     |                                                                | O                                                    |                                                                |
| 18. I feel energy                                     | O                                                     |                                                                | O                                                    |                                                                |
| 19. I only think about<br>riding/playing with the dog | O                                                     |                                                                | O                                                    |                                                                |
| 20. I feel inferior                                   | O                                                     |                                                                | O                                                    |                                                                |
| 21. Strong                                            | O                                                     |                                                                | O                                                    |                                                                |
| 22. Motivated to achieve more                         | O                                                     |                                                                | O                                                    |                                                                |
| 23. Exhausted                                         | O                                                     |                                                                | O                                                    |                                                                |
| 24. Safe                                              | O                                                     |                                                                | O                                                    |                                                                |
| 25. Breathless                                        | O                                                     |                                                                | O                                                    |                                                                |
| 26. Accepted by the others                            | O                                                     |                                                                | O                                                    |                                                                |
| 27. Relieved because I<br>managed the challenge       | O                                                     |                                                                | O                                                    |                                                                |
| 28. Sad                                               | O                                                     |                                                                | O                                                    |                                                                |

Which face illustrates best how you felt during and feel now after riding/dog playing or dog walking?

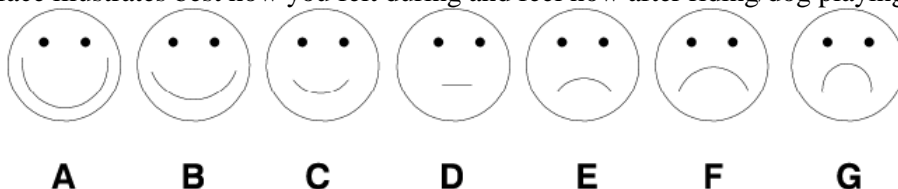

Supplement: ijerph-17-01865-s001.pdf [file ijerph-17-01865-s001.pdf]
